# Supplementary material
Source: publisher figshare collection journal article supplement (https://springernature.figshare.com/ndownloader/files/24089339)
Supplement: Supplementary file 1 [file 24089339]

# Documentation of available data that accompanies ‘Riders on the storm: loggerhead sea turtles detect and respond to a major hurricane in the Northwest Atlantic Ocean’

Leah M. Crowe<sup>\*a</sup>, Joshua M. Hatch<sup>b</sup>, Samir H. Patel<sup>c</sup>, Ronald J. Smolowitz<sup>c</sup>, Heather L. Haas<sup>b</sup>

July 14, 2020

\*Corresponding Author

<sup>a</sup>Integrated Statistics under contract to the Northeast Fisheries Science Center, National Marine Fisheries Service, National Oceanic and Atmospheric Administration, 166 Water Street Woods Hole, MA 02543 USA. <sup>b</sup>Northeast Fisheries Science Center, National Marine Fisheries Service, National Oceanic and Atmospheric Administration, 166 Water Street Woods Hole, MA 02543 USA. <sup>c</sup>Coonamessett Farm Foundation, 277 Hatchville Road East Falmouth, MA 02536 USA.

---

The data included here have been filtered according to the methods, and the following definitions apply to all datasets:

- **ID** = identification letter assigned in this study
- **TIME2DAY0** = the time before (negative) or after (positive) when the turtle and the hurricane were at their closest point,  $T_0$
- **phase** = the phase assignment based on the time from  $T_0$  (TIME2DAY0)

---

Location data: Croweetal2020\_Ridersonthestorm\_location.csv

This dataset includes location data from ARGOS and Fastloc-GPS sources for the *Before* through *After* phases.

- **D\_DATE** = UTC. For ARGOS data: The time assigned to the location by ARGOS. For Fastloc-GPS data: the time that the fix was obtained
  - **LQ** = Location quality where values 1–3 indicate ARGOS positions and 9 indicates Fastloc-GPS
  - **LAT** = Position estimate (WGS 84 datum)
  - **LON** = Position estimate (WGS 84 datum)
-

Dive data: Croweetal2020\_Ridersonthe storm\_dive.csv

This dataset includes daytime dive data (duration and maximum dive depth) from turtles that remained in their foraging grounds after Hurricane Irene passed (turtles  $a - j$ ).

- **DS\_EDT** = the dive start (Eastern Daylight Time) when the threshold depth was crossed
  - **divehr** = the dive duration (hours)
  - **MAX\_DEP** = The maximum dive depth recorded (decibars)
- 

Temperature-depth data: Croweetal2020\_Ridersonthe storm\_tempdep.csv

This dataset includes temperature-depth data from turtles that remained in their foraging grounds after Hurricane Irene passed and were within a similar latitudinal range (turtles  $b - i$ )

- **END\_DATE** = The time of the end of the upcast
- **TEMP\_DBAR** = A comma-separated list of the pressure coordinates of the (pressure,temperature) profile (decibars)
- **TEMP\_VALS** = A comma-separated list of the temperature coordinates of the (pressure,temperature) profile ( $^{\circ}\text{C}$ )
